# Supplementary material for: TRIP13 and APC15 drive mitotic exit by turnover of interphase- and unattached kinetochore-produced MCC
Source: PubMed Central journal article supplement (PMC6195577; doi:10.1038/s41467-018-06774-1), 2018-10-19
Supplement: 41467_2018_6774_MOESM2_ESM.pdf [file 41467_2018_6774_MOESM2_ESM.pdf]

**TRIP13 and APC15 drive mitotic exit by turnover of interphase- and unattached kinetochore-produced MCC**

**Kim et al.**

## **Table of Contents**

**Supplementary Table 1**

**Supplementary Figure 1**

**Supplementary Figure 2**

**Supplementary Figure 3**

**Supplementary Figure 4**

**Supplementary Figure 5**

**Supplementary Table1. Oligonucleotides used in this study**

| Oligo Name                  | Sequences                                               |
|-----------------------------|---------------------------------------------------------|
| Mad2_H191A_F                | CGTTCATTTACTACTACAATCGCCAAAGTAAATAGCATGGTGGC            |
| Mad2_H191A_R                | GCCACCATGCTATTTACTTTGGCGATTGTAGTAGTAAATGAACG            |
| TRIP13_E253Q_F              | ACTCTCCACCTGATCAATCAGCACGAACACCAG                       |
| TRIP13_E253Q_R              | CTGGTGTTTCGTGCTGATTGATCAGGTGGAGAGT                      |
| TRIP13_gRNA                 | CACCGTCTCGGGGGCGCCATGGACG                               |
| Mad2_3'UTR_siRNA1           | CCUAUUGAAUCAGUUUCCAAUUU                                 |
| Mad2_3'UTR_siRNA2           | CAGUAUAGGUAGGGAGAUUU                                    |
| APC15_siRNA                 | GUCUGGUCUAAGUUUCUUU                                     |
| p31 <sup>comet</sup> _siRNA | AGTGGTATGAGAAGTCCGAAG                                   |
| BubR1_UTR_siRNA             | CUGUAUGUGCUGUAAUUUUUU                                   |
| TPR_CDS_siRNA               | GCACAACAGGAUAAGGUUUUU                                   |
| Control siRNA               | ON-TARGETplus™ Non-Targeting Pool (Cat# D-001810-10-05) |

# Supplementary Figure 1. TRIP13 is required for its role in checkpoint activation

**A**

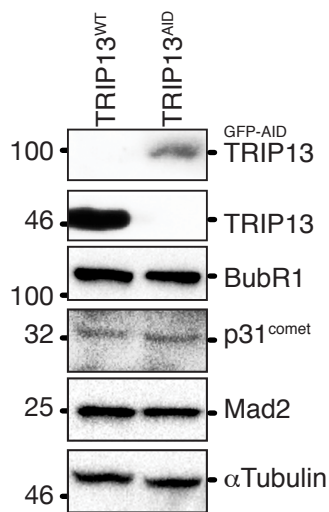

**B**

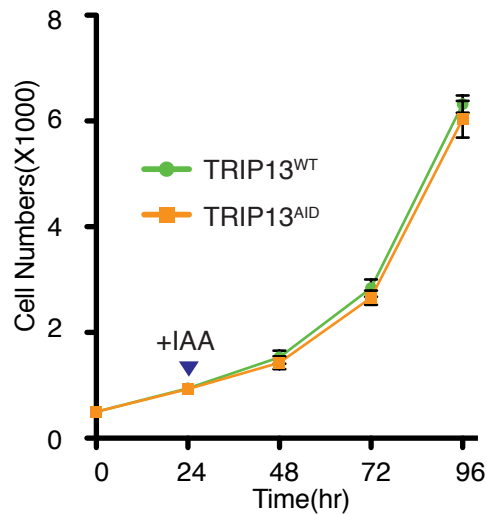

**C**

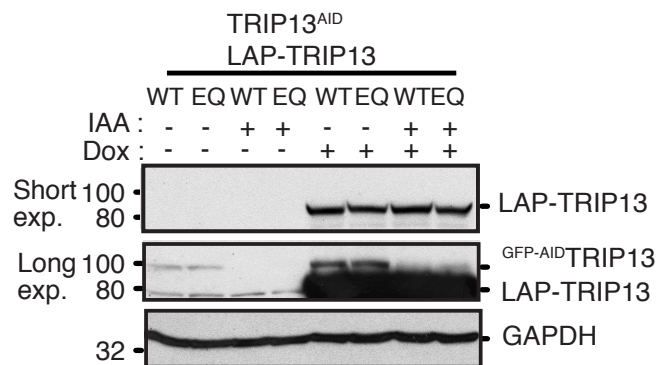

**D**

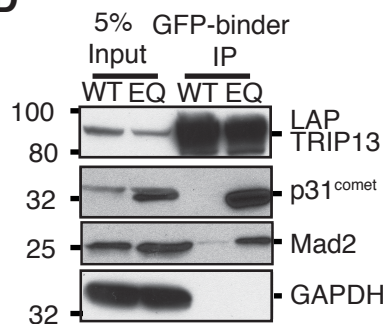

**E**

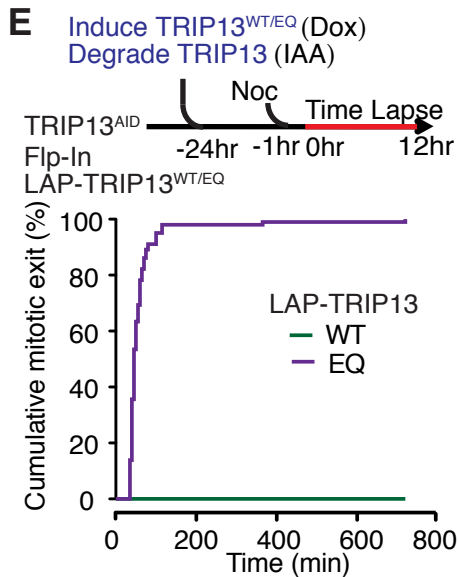

**F**

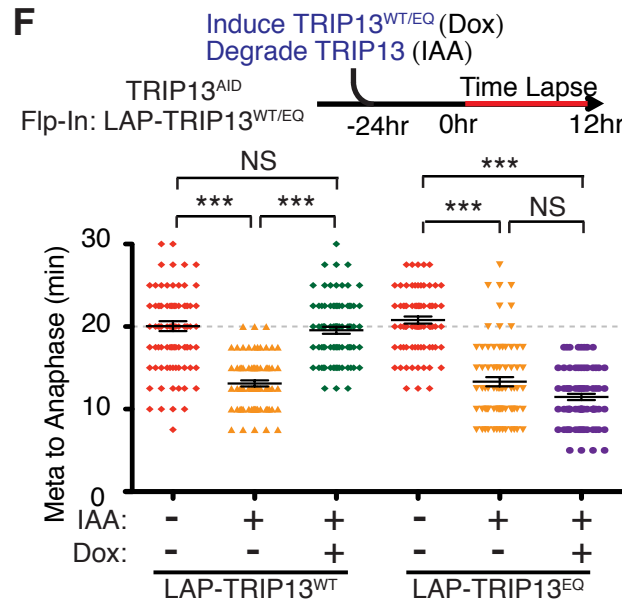

**G**

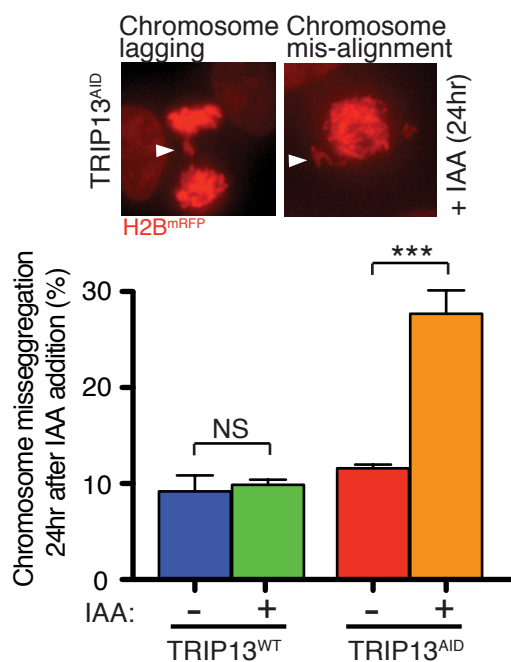

**H**

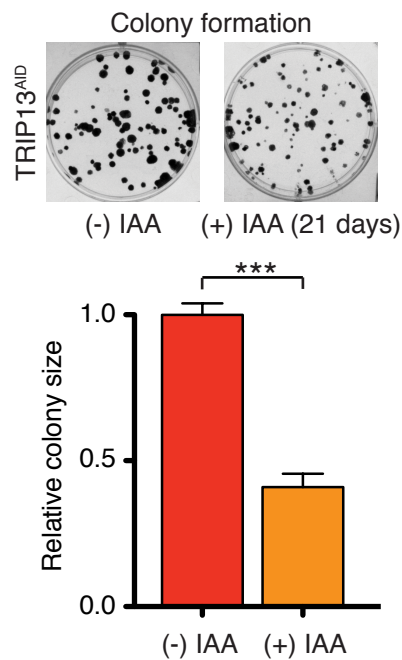

**Supplementary Figure 1. TRIP13 ATPase activity is required for checkpoint activation.**

- A)** Protein expression level of TRIP13, BubR1, p31<sup>comet</sup>, Mad2 and  $\alpha$ -tubulin were measured by quantitative immunoblotting in TRIP13<sup>WT</sup> and TRIP13<sup>AID</sup> cells.
- B)** Growth rate of TRIP13<sup>WT</sup> and TRIP13<sup>AID</sup> in the absence of TRIP13. IAA was added 24 hours after plating.
- C)** Replacement of GFP-AID-TRIP13 with LAP-TRIP13<sup>WT</sup> or LAP-TRIP13<sup>EQ</sup> was monitored by immunoblotting after treatment of IAA and doxycycline in TRIP13<sup>AID</sup> Flp-In LAP-TRIP13<sup>WT/EQ</sup> cells.
- D)** LAP-TRIP13<sup>WT</sup> or LAP-TRIP13<sup>EQ</sup> interacting components in TRIP13<sup>AID</sup>. GFP-AID-TRIP13 was replaced with LAP-TRIP13<sup>WT</sup> or LAP-TRIP13<sup>EQ</sup> in TRIP13<sup>AID</sup> Flp-In LAP-TRIP13<sup>WT/EQ</sup>. TRIP13 interacting proteins were immunopurified using GFP-binder beads and analyzed by immunoblotting. The TRIP13<sup>EQ</sup> mutation stabilizes TRIP13 hexamer formation and inhibits ATP hydrolysis<sup>52</sup>, and LAP-TRIP13<sup>EQ</sup> binds both p31<sup>comet</sup> and Mad2 more stably than LAP-TRIP13<sup>WT</sup>.
- E)** TRIP13 ATPase activity is required for mitotic exit. (Top) Schematic of experiments testing the role of TRIP13 ATPase activity in checkpoint activation. (Bottom) Timing of mitotic exit in TRIP13<sup>AID</sup> Flp-In LAP-TRIP13<sup>WT/EQ</sup> cells was monitored by live-cell imaging in the presence of nocodazole 24hr after IAA and doxycycline addition (nocodazole was added 1 hour prior to filming). (n=50 for each condition)
- F)** Mitotic timing after replacement of GFP-AID-TRIP13<sup>WT</sup> with LAP-TRIP13<sup>WT/EQ</sup>. (n=75 for each condition)
- G)** *Upper:* Representative images of lagging and mis-aligned chromosomes in TRIP13<sup>AID</sup> cells after 24-hour IAA treatment. *Lower:* Mitotic error rates of TRIP13<sup>WT</sup> and TRIP13<sup>AID</sup> cells after 24-hour IAA treatment were calculated by counting lagging and mis-aligned chromosomes in mitosis. Total cell counted: n=252, 356, 286 and 357 for each experimental condition from 3 independent experiments.
- H)** *Upper:* Colony size in TRIP13<sup>AID</sup> cells after 21-day growth with or without IAA. *Lower:* Relative colony size for 21-day IAA treated versus untreated cells (mean  $\pm$  s.e.m. of six independent

experiments). See Supplementary Figure 1B for analysis of TRIP13<sup>WT</sup> versus TRIP13<sup>AID</sup> cell growth in the presence and absence of IAA, and for replacement of TRIP13 with TRIP13<sup>WT</sup> and TRIP13<sup>EQ</sup>.

P-values showing in panel F, G and H were calculated in Prism v. 7 using an unpaired two-tailed t-test (\*\*:  $p < 0.01$ , \*\*\*:  $p < 0.001$ , NS=not significant).

# Supplementary Figure 2. Mitotic delay by TRIP13 depletion is dependent on Mad2.

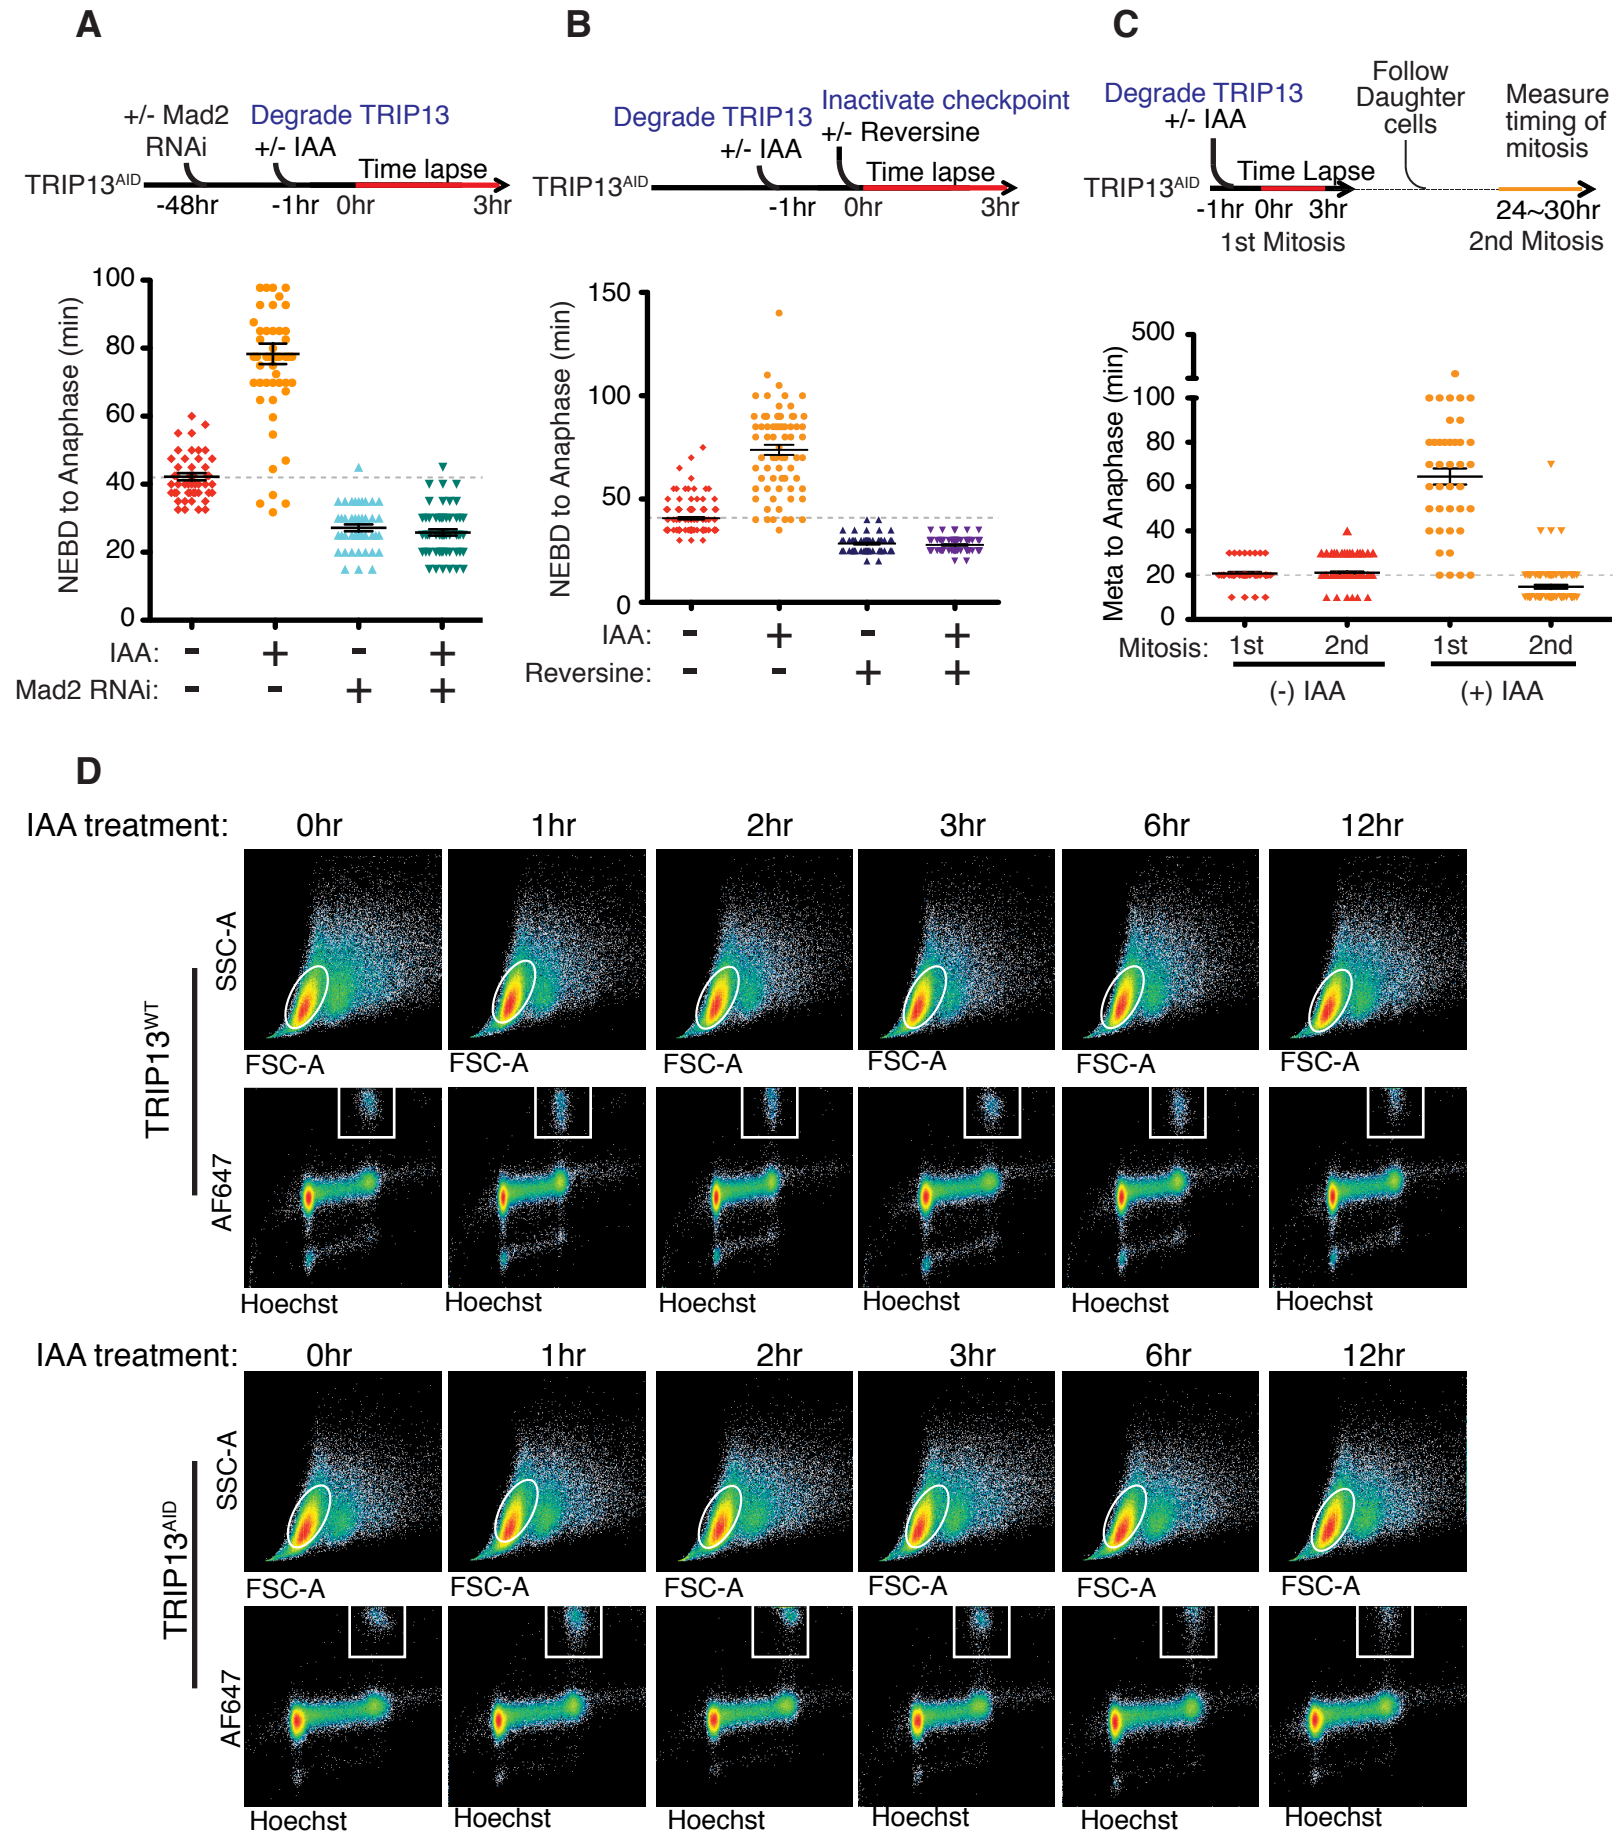

**Supplementary Figure 2. TRIP13 regulates checkpoint activation and silencing through MCC.**

- A)** *Upper:* Schematic of experiment to measure the dependence of the observed mitotic exit delay on Mad2. *Lower:* NEBD-to-anaphase timing (there is no definable metaphase in Mad2-depleted cells) in Mad2-RNAi TRIP13<sup>AID</sup> cells. (n=55 for each condition)
- B)** *Upper:* Schematic of experiment to measure the dependence of the observed mitotic exit delay on kinetochore-catalyzed MCC production. *Lower:* NEBD-to-anaphase timing in reversine-treated TRIP13<sup>AID</sup> cells. (From left to right panel, n= 84, 75, 54 and 58)
- C)** Two rounds of unperturbed cell cycles were monitored after TRIP13 depletion. Cells were strongly delayed in exiting mitosis within the first 3 hours after TRIP13 degradation, but these cells' daughters showed faster-than-wildtype exit from mitosis. The daughter cells likely did not activate the checkpoint for even the short time that most wild-type cells do. (n=50 of parental cells for each condition)
- D)** Gating strategy to measure mitotic population (Related to Figure 2F). Population of phospho-histone H3 (Ser10) Alexa647 (AF647) positive TRIP13<sup>WT</sup> and TRIP13<sup>AID</sup> cells was measured using flow cytometry at different time points after IAA treatment. (Total cells counted for each condition: 10000)



# Supplementary Figure 3. TRIP13 alters accumulation of Mad2 and p31.

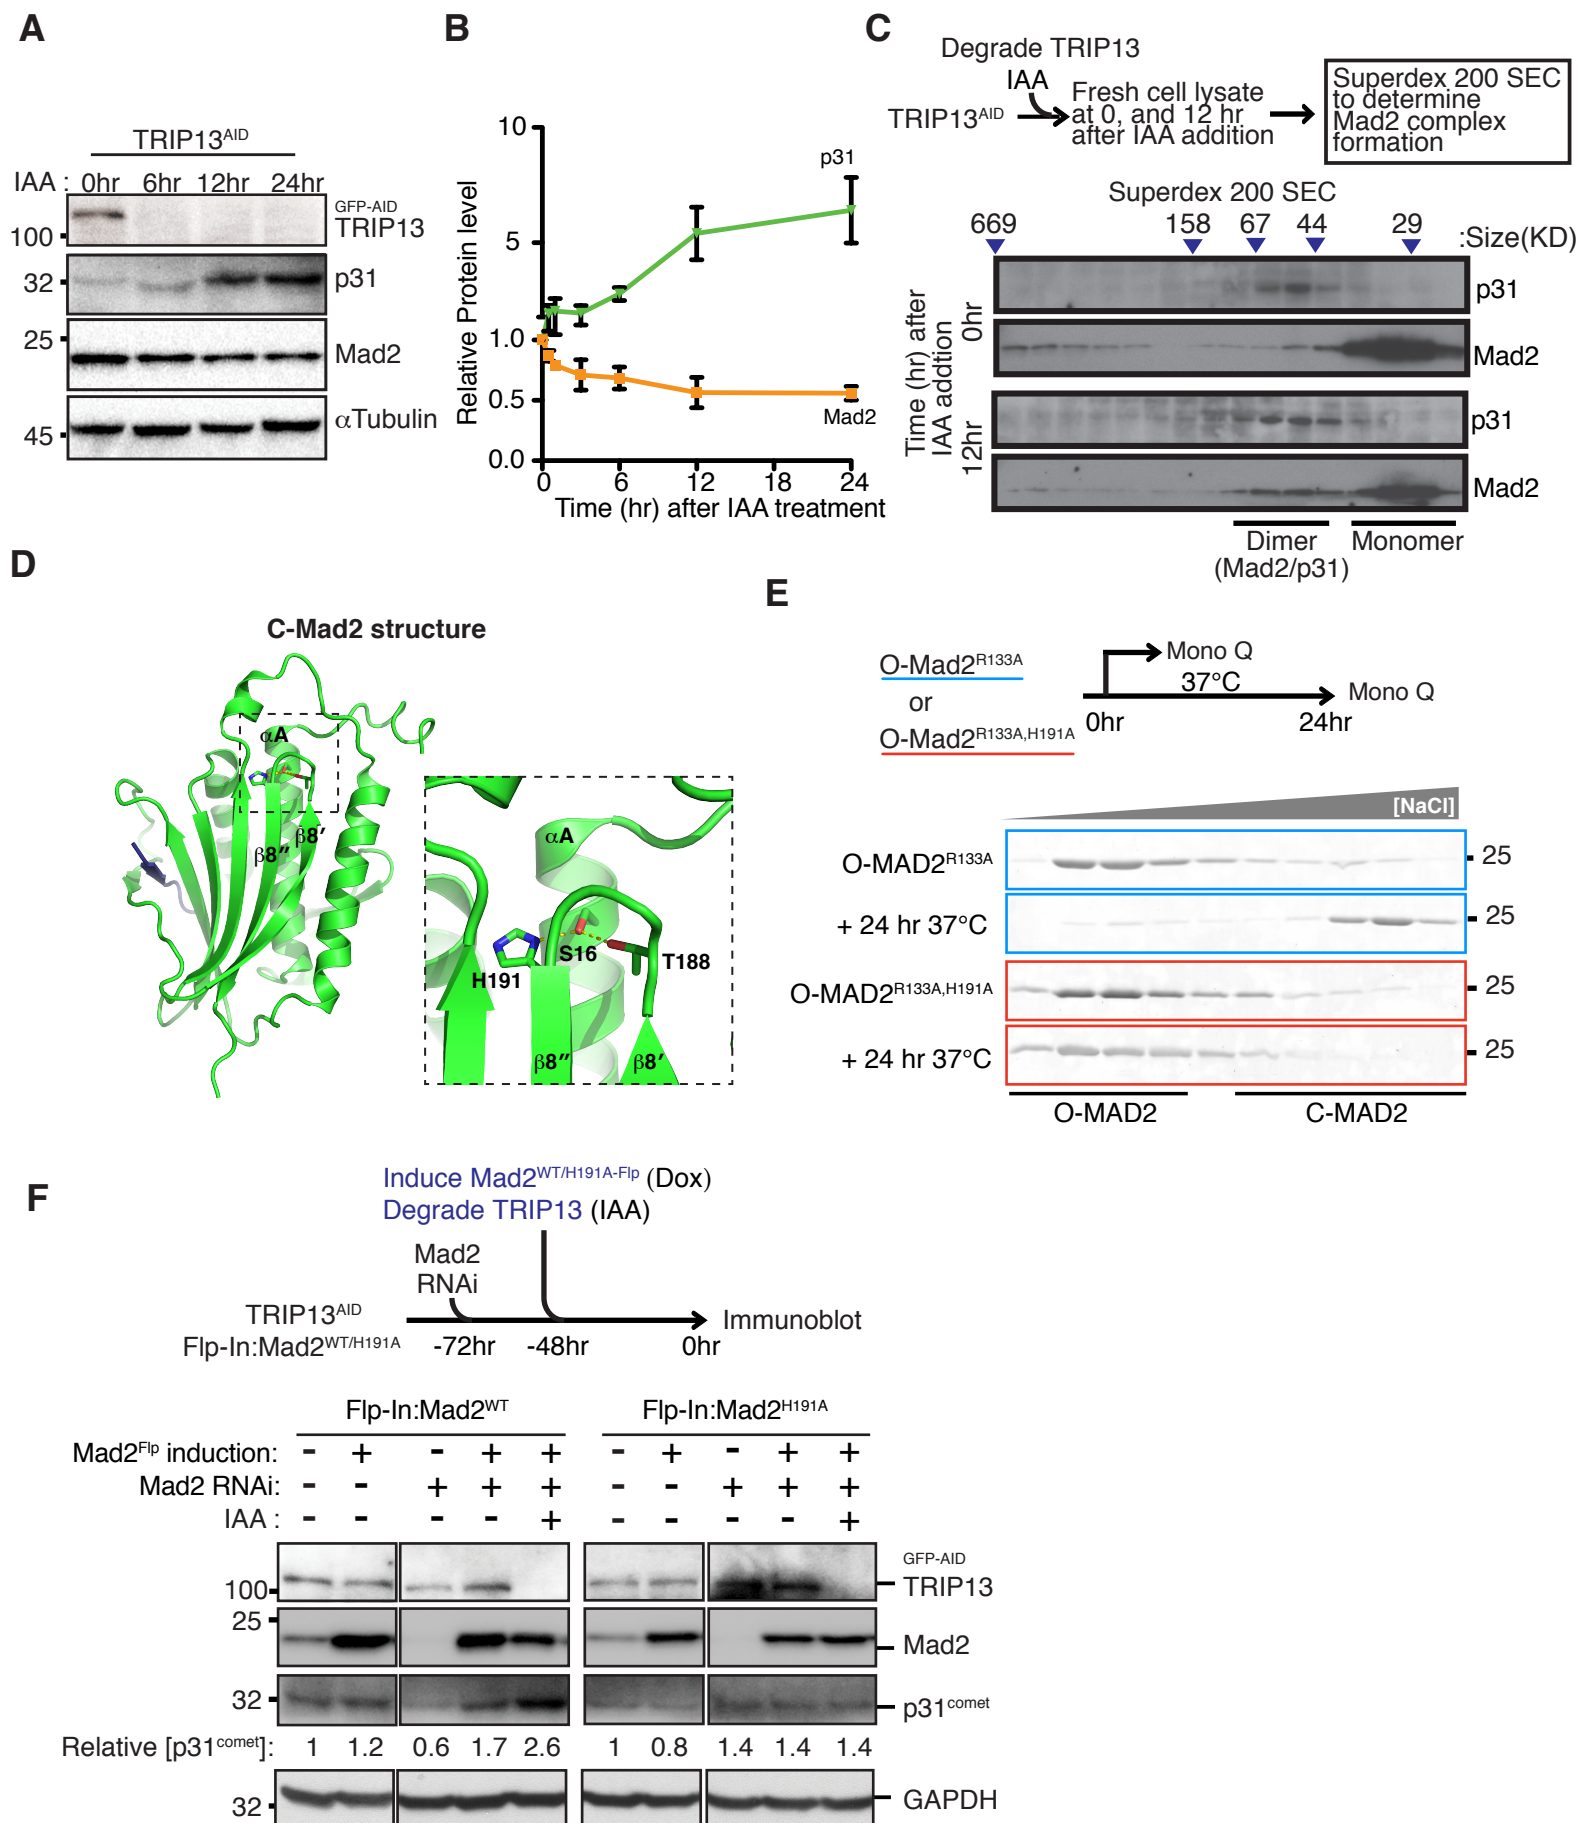

**Supplementary Figure 3. TRIP13 regulates homeostasis of Mad2 and p31<sup>comet</sup>.**

- A)** Quantitative immunoblot analysis of Mad2 and p31<sup>comet</sup> levels after TRIP13 depletion in TRIP13<sup>AID</sup> cells.
- B)** Relative levels of Mad2 and p31<sup>comet</sup> in TRIP13<sup>AID</sup> cells upon TRIP13 depletion, from 3 independent quantitative immunoblot analyses.
- C)** Proteins from TRIP13<sup>AID</sup> in the presence or absence of TRIP13 were purified by size-exclusion chromatography (Superdex 200, GE Life Sciences). Fractions were collected and analyzed by SDS-PAGE followed by immunoblot against Mad2 and p31<sup>comet</sup> antibodies.
- D)** Structure of closed Mad2 (PDB ID 2V64, <sup>16</sup>), showing the conserved hydrogen-bond network between helix  $\alpha$ A and strands  $\beta$ 8' and  $\beta$ 8'' that stabilizes the closed conformation <sup>52, 63</sup>.
- E)** Mono-Q ion-exchange profiles of purified O-Mad2<sup>R133A</sup> (dimerization-defective mutant) versus O-Mad2<sup>R133A/H191A</sup>, before and after a 24-hour incubation at 37°C. Mad2<sup>R133A</sup> converts entirely to the closed conformation, while Mad2<sup>R133A/H191A</sup> remains in the open conformation.
- F)** (Top) Schematic of the approach to replace endogenous Mad2 with Mad2<sup>WT/H191A-Flp</sup> in TRIP13 depleted cells. (Bottom) Endogenous Mad2 was depleted by siRNA targeting 3'UTR of Mad2 and Mad2<sup>WT/H191A-Flp</sup> was induced by doxycycline. Mad2 and p31<sup>comet</sup> levels were measured by quantitative immunoblotting. Whereas TRIP13 depletion results in a marked stabilization of p31<sup>comet</sup> in the presence of Mad2<sup>WT</sup>, p31<sup>comet</sup> is not stabilized in the presence of Mad2<sup>H191A</sup>, which predominantly adopts the open conformation in solution.

# Supplementary Figure 4. TRIP13 and APC15 are required for turnover of interphase MCC.

**A**

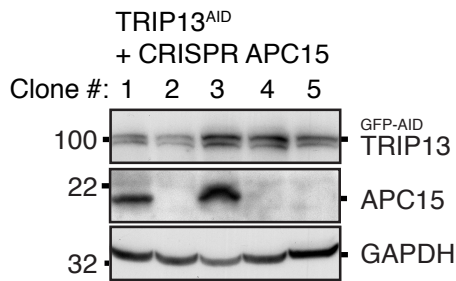

**B**

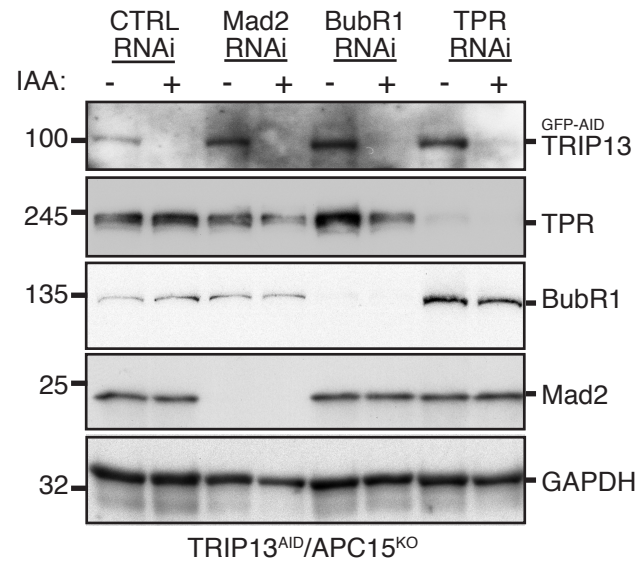

**C**

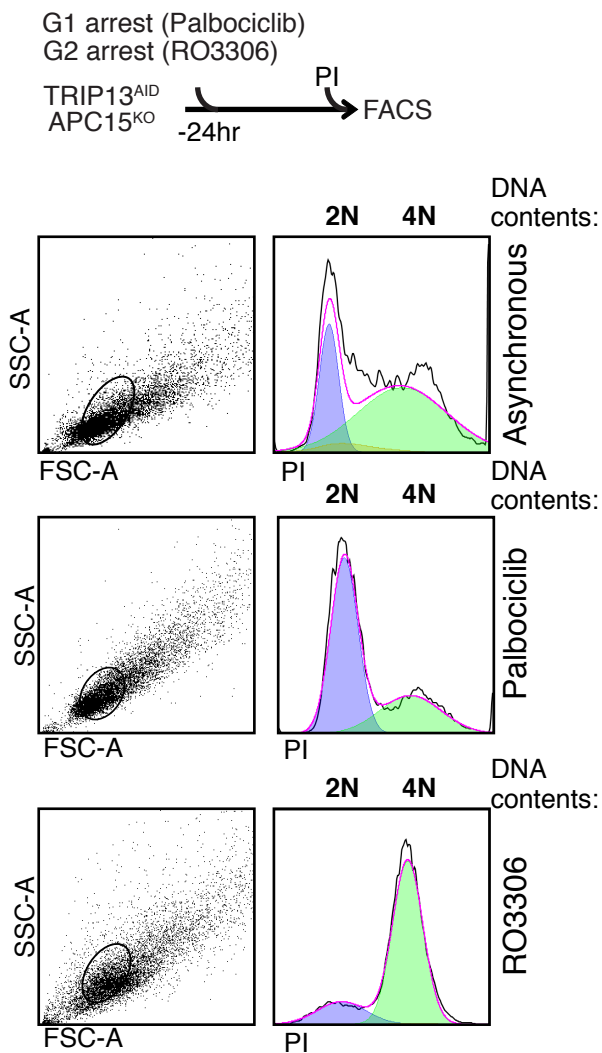

**D**

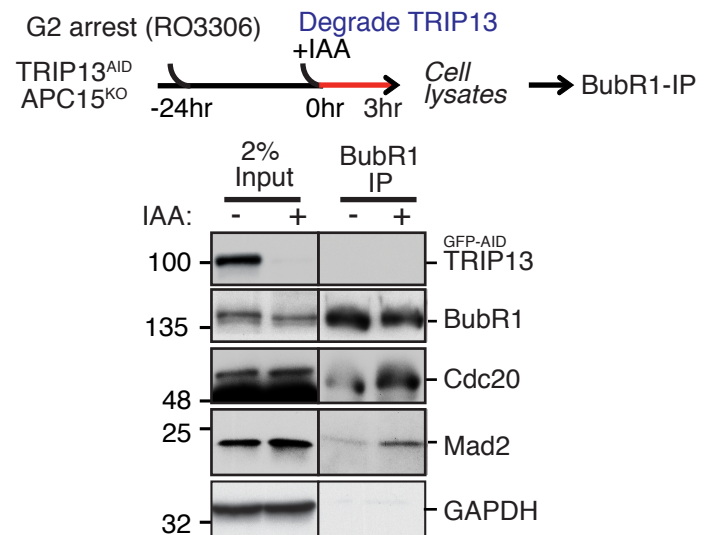

**Supplementary Figure 4. Turnover of interphase MCC requires TRIP13 and APC15.** (related to Figure 4)

- A)** Screening of TRIP13<sup>AID</sup>/APC15<sup>KO</sup> cells using western blot analysis from five independent clones, generated using CRISPR/Cas9-based gene disruption from TRIP13<sup>AID</sup> cells.
- B)** Western blot showing effective depletion of Mad2, BubR1 and TPR by RNAi in TRIP13<sup>AID</sup>/APC15<sup>KO</sup> cells in Figure 4B, 4C.
- C)** *Upper:* Schematic of experiment to confirm synchronization of TRIP13<sup>AID</sup>/APC15<sup>KO</sup> cells in Figure 4D. Cells were synchronized in G1 with Palbociclib and in late G2 with RO-3306. DNA contents were measured by FACS after propidium iodide (PI) staining.

# Supplementary Figure 5. Uncropped Western blot scan

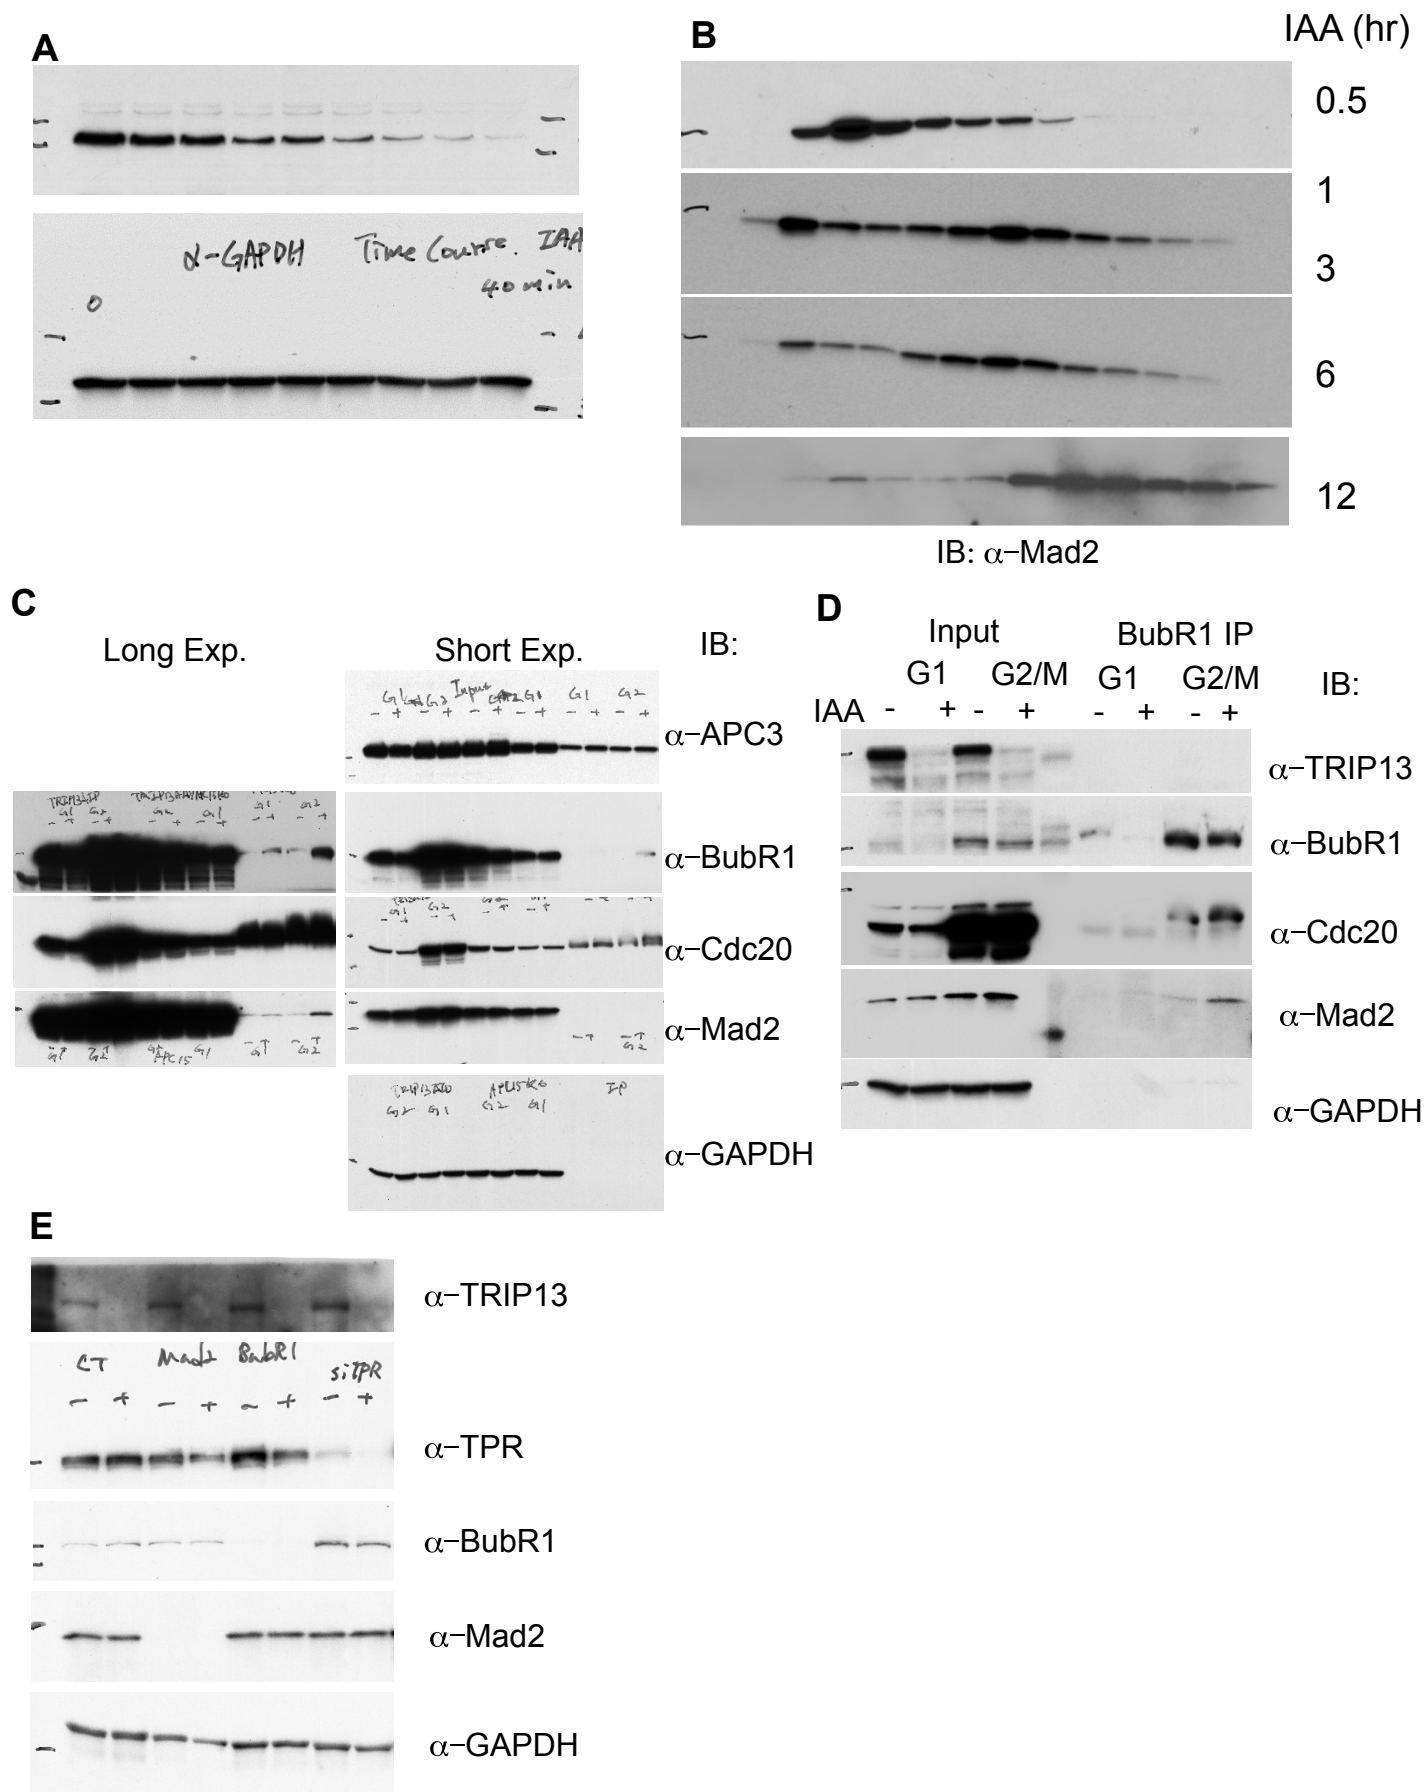

**Supplementary Figure 5. Uncropped western blot scan**

- A)** uncropped western blot scan from Figure 1B.
- B)** uncropped western blot scan from Figure 2A.
- C)** uncropped western blot scan from Figure 4D.
- D)** uncropped western blot scan from Supplementary Figure 4D.
